# Supplementary material for: Triglyceride–Glucose Index as a Potential Indicator of Sarcopenic Obesity in Older People
Source: MDPI journal article supplement (doi:10.3390/nu15030555), 2023-01-20
Supplement: s1 [file s1]

**Table S1.** Characteristics of young reference group.

|                                    | <b>Overall<br/>(n = 4918)</b> | <b>Males<br/>(n = 1910)</b> | <b>Females<br/>(n = 3008)</b> | <b>P Value</b> |
|------------------------------------|-------------------------------|-----------------------------|-------------------------------|----------------|
| Sarcopenia index <sup>†</sup>      | 28.89 ± 4.27                  | 33.10 ± 2.92                | 26.22 ± 2.47                  | < 0.001        |
| Age, year                          | 31.4 ± 5.5                    | 31.3 ± 5.5                  | 31.5 ± 5.5                    | 0.261          |
| Height, cm <sup>†</sup>            | 165.4 ± 8.5                   | 173.4 ± 5.8                 | 160.4 ± 5.5                   | < 0.001        |
| Body weight, kg <sup>†</sup>       | 62.8 ± 12.9                   | 72.4 ± 11.5                 | 56.7 ± 9.6                    | < 0.001        |
| Body mass index, kg/m <sup>2</sup> | 22.8 ± 3.6                    | 24.1 ± 3.4                  | 22.0 ± 3.5                    | < 0.001        |
| Waist circumference, cm            | 77.25 ± 10.28                 | 82.75 ± 9.38                | 73.75 ± 9.25                  | < 0.001        |
| ASM, kg                            | 18.29 ± 5.18                  | 23.81 ± 3.32                | 14.79 ± 2.29                  | < 0.001        |

Values are means ± SD. †Mann-Whitney U test was applied to assess the difference between groups. Sarcopenia index = (ASM/body mass) × 100; ASM = Appendicular skeletal muscle mass.

**Table S2.** Characteristics and comparisons of study participants.

|                          | <b>Overall<br/>(n = 3821)</b> | <b>Males<br/>(n = 1636)</b> | <b>Females<br/>(n = 2185)</b> | <b>P Value</b> |
|--------------------------|-------------------------------|-----------------------------|-------------------------------|----------------|
| ALM, kg                  | 17.56 ± 4.17                  | 17.66 ± 4.13                | 17.49 ± 4.20                  | 0.227          |
| ABM, kg                  | 0.95 ± 0.29                   | 0.96 ± 0.29                 | 0.94 ± 0.29                   | 0.113          |
| WBFM, kg                 | 17.09 ± 5.77                  | 17.12 ± 5.71                | 17.06 ± 5.82                  | 0.726          |
| WBLM, kg                 | 42.04 ± 8.28                  | 42.18 ± 8.16                | 41.92 ± 8.36                  | 0.340          |
| %FM, %                   | 28.78 ± 8.08                  | 28.77 ± 8.15                | 28.78 ± 8.04                  | 0.974          |
| SBP, mmHg                | 130.9 ± 17.6                  | 130.5 ± 17.3                | 131.2 ± 17.9                  | 0.267          |
| DBP, mmHg                | 77.9 ± 9.2                    | 77.9 ± 9.9                  | 78.0 ± 9.9                    | 0.789          |
| TC, mg/dL                | 191.5 ± 36.5                  | 191.7 ± 36.4                | 191.4 ± 36.6                  | 0.795          |
| HDL, mg/dL               | 46.2 ± 10.9                   | 46.2 ± 10.7                 | 46.2 ± 11.1                   | 0.920          |
| AST, U/L <sup>†</sup>    | 24.0 ± 11.4                   | 23.9 ± 12.0                 | 24.1 ± 10.9                   | 0.711          |
| ALT, U/L <sup>†</sup>    | 20.6 ± 13.1                   | 20.4 ± 13.4                 | 20.8 ± 12.9                   | 0.455          |
| Creatinine, mg/dL        | 0.841 ± 0.251                 | 0.842 ± 0.276               | 0.840 ± 0.231                 | 0.826          |
| Nutrition                |                               |                             |                               |                |
| TEI, kcal/d              | 1718.8 ± 667.5                | 1727.6 ± 666.6              | 1712.2 ± 668.2                | 0.480          |
| Carbohydrate, g          | 310.4 ± 112.8                 | 310.1 ± 108.7               | 310.5 ± 115.7                 | 0.913          |
| Protein, g <sup>†</sup>  | 57.3 ± 30.5                   | 58.1 ± 31.5                 | 56.7 ± 29.8                   | 0.293          |
| Fat, g                   | 24.6 ± 22.7                   | 24.8 ± 20.9                 | 24.5 ± 23.9                   | 0.709          |
| Medication (%)           |                               |                             |                               |                |
| Hypertension             | 1691 (44.3)                   | 657 (40.2)                  | 1034 (47.3)                   | < 0.001        |
| Dyslipidemia             | 358 (9.4)                     | 107 (6.5)                   | 251 (11.5)                    | < 0.001        |
| Medical history (%)      |                               |                             |                               |                |
| Stroke                   | 201 (5.3)                     | 101 (6.2)                   | 100 (4.6)                     | < 0.05         |
| CVD                      | 239 (6.3)                     | 124 (7.6)                   | 115 (5.3)                     | < 0.01         |
| Cancer                   | 395 (10.3)                    | 134 (8.2)                   | 261 (12.0)                    | < 0.001        |
| Liver disease            | 74 (1.9)                      | 42 (2.6)                    | 32 (1.5)                      | < 0.05         |
| Arthritis                | 1414 (37.0)                   | 297 (18.2)                  | 1117 (51.1)                   | < 0.001        |
| Phthisis                 | 360 (9.4)                     | 212 (13.0)                  | 148 (6.8)                     | < 0.001        |
| Asthma                   | 275 (7.2)                     | 111 (6.8)                   | 164 (7.5)                     | 0.411          |
| Atopic dermatitis        | 73 (1.9)                      | 27 (1.7)                    | 46 (2.1)                      | 0.341          |
| MVPA (%)                 |                               |                             |                               | 0.723          |
| Low (< 150 min/week)     | 2979 (78.0)                   | 1271 (77.7)                 | 1708 (78.2)                   |                |
| High (≥ 150 min/week)    | 842 (22.0)                    | 365 (22.3)                  | 477 (21.8)                    |                |
| Household income (%)     |                               |                             |                               | < 0.001        |
| Low                      | 1778 (46.5)                   | 675 (41.3)                  | 1103 (50.5)                   |                |
| Lower middle             | 977 (25.6)                    | 448 (27.4)                  | 529 (24.2)                    |                |
| Upper middle             | 610 (16.0)                    | 290 (17.7)                  | 320 (14.6)                    |                |
| High                     | 456 (11.9)                    | 223 (13.6)                  | 233 (10.7)                    |                |
| Education level (%)      |                               |                             |                               | < 0.001        |
| Primary school           | 2512 (65.7)                   | 742 (45.4)                  | 1770 (81.0)                   |                |
| Middle school            | 529 (13.8)                    | 331 (20.2)                  | 198 (9.1)                     |                |
| High school              | 536 (14.0)                    | 367 (22.4)                  | 169 (7.7)                     |                |
| College                  | 244 (6.4)                     | 196 (12.0)                  | 48 (2.2)                      |                |
| Alcohol consumption (%)  |                               |                             |                               | < 0.001        |
| No drink for last a year | 1860 (48.7)                   | 484 (29.6)                  | 1376 (63.0)                   |                |
| ≤ once a week            | 1252 (32.8)                   | 541 (33.1)                  | 711 (32.5)                    |                |
| 2-3 times/week           | 322 (8.4)                     | 263 (16.1)                  | 59 (2.7)                      |                |

|                     |             |            |             |        |
|---------------------|-------------|------------|-------------|--------|
| ≥ 4 times/week      | 387 (10.1)  | 348 (21.3) | 39 (1.8)    |        |
| Current smoking (%) |             |            |             | < 0.05 |
| Never               | 1095 (28.7) | 508 (31.1) | 587 (26.9)  |        |
| Former smoking      | 490 (12.8)  | 202 (12.3) | 288 (13.2)  |        |
| Current smoking     | 2236 (58.5) | 926 (56.6) | 1310 (60.0) |        |

---

Values are means ± SD. †Mann-Whitney U test was applied to assess the difference between groups. ALM = appendicular lean mass; ABM = appendicular bone mass; WBFM = whole body fat mass; WBLM = whole body lean mass; %FM = percentage of fat mass; SBP = systolic blood pressure; DBP = diastolic blood pressure; TC = total cholesterol; HDL = high density lipoprotein; AST = Aspartate transaminase; ALT = alanine transaminase; TEI = total energy intake; CVD = cardiovascular disease; MVPA = moderate to vigorous physical activity.

**Table S3.** The sex-specific differences and trends of participants by TyG Index tertile.

|                         | <b>A</b><br><b>The lowest</b>      | <b>B</b><br><b>The middle</b>      | <b>C</b><br><b>The highest</b>     | <b>Post-hoc</b> | <b>SS<sup>‡</sup></b> | <b>P for trend<sup>‡</sup></b> |
|-------------------------|------------------------------------|------------------------------------|------------------------------------|-----------------|-----------------------|--------------------------------|
| <b>Men</b>              |                                    |                                    |                                    |                 |                       |                                |
| <i>n</i>                | 542                                | 551                                | 543                                |                 |                       |                                |
| ALM, kg                 | 17.74 ± 4.10<br>(17.40, 18.09)     | 17.49 ± 4.10<br>(17.15, 17.83)     | 17.74 ± 4.19<br>(17.39, 18.10)     | NS              | -0.11                 | 0.909                          |
| ABM, kg                 | 0.96 ± 0.30<br>(0.94, 0.99)        | 0.94 ± 0.28<br>(0.92, 0.97)        | 0.97 ± 0.30<br>(0.95, 1.00)        | NS              | 0.58                  | 0.565                          |
| WBFM, kg <sup>†</sup>   | 15.60 ± 5.97<br>(15.09, 16.10)     | 17.49 ± 5.71<br>(17.01, 17.96)     | 18.28 ± 5.08<br>(17.85, 18.71)     | A < B < C       | 7.92                  | < 0.001                        |
| WBLM, kg                | 42.10 ± 8.20<br>(41.40, 42.79)     | 41.81 ± 8.01<br>(42.14, 42.48)     | 42.65 ± 8.28<br>(41.95, 43.34)     | NS              | 1.01                  | 0.314                          |
| %FM, % <sup>†</sup>     | 26.80 ± 8.47<br>(26.08, 27.51)     | 29.42 ± 8.22<br>(28.73, 30.11)     | 30.09 ± 7.35<br>(29.47, 30.71)     | A < B, C        | 6.36                  | < 0.001                        |
| SBP, mm Hg              | 128.6 ± 17.6<br>(127.1, 130.0)     | 130.2 ± 17.2<br>(128.7, 131.6)     | 132.9 ± 16.9<br>(131.5, 134.3)     | A, B < C        | 4.47                  | < 0.001                        |
| DBP, mm Hg              | 76.9 ± 9.8<br>(76.1, 77.7)         | 78.3 ± 10.1<br>(77.5, 79.1)        | 78.5 ± 9.9<br>(77.6, 79.3)         | A < C           | 2.73                  | < 0.01                         |
| TC, mg/dL <sup>†</sup>  | 182.6 ± 33.0<br>(179.8, 185.4)     | 193.2 ± 34.7<br>(190.3, 196.1)     | 199.4 ± 39.3<br>(196.1, 202.7)     | A < B < C       | 7.37                  | < 0.001                        |
| HDL, mg/dL <sup>†</sup> | 50.5 ± 10.7<br>(49.6, 51.4)        | 46.3 ± 10.0<br>(45.5, 47.2)        | 41.8 ± 9.7<br>(41.0, 42.6)         | A > B > C       | -14.01                | < 0.001                        |
| AST, U/L <sup>†</sup>   | 23.9 ± 12.8<br>(22.8, 25.0)        | 22.9 ± 8.2<br>(22.3, 23.6)         | 25.0 ± 14.2<br>(23.8, 26.2)        | B < C           | 0.74                  | 0.461                          |
| ALT, U/L <sup>†</sup>   | 18.5 ± 9.8<br>(17.7, 19.4)         | 19.4 ± 10.0<br>(18.6, 20.3)        | 23.3 ± 18.2<br>(21.8, 24.8)        | A, B < C        | 6.45                  | < 0.001                        |
| Crea, mg/dL             | 0.841 ± 0.354<br>(0.811, 0.871)    | 0.835 ± 0.255<br>(0.813, 0.856)    | 0.851 ± 0.197<br>(0.835, 0.868)    | NS              | 2.12                  | < 0.05                         |
| TEI, kcal/d             | 1723.4 ± 629.0<br>(1670.3, 1776.5) | 1726.1 ± 670.9<br>(1670.0, 1782.2) | 1733.5 ± 699.1<br>(1674.5, 1792.4) | NS              | -0.40                 | 0.692                          |
| Cabo, g                 | 311.9 ± 106.1<br>(303.0, 320.9)    | 310.0 ± 109.6<br>(300.9, 319.2)    | 308.4 ± 110.5<br>(299.1, 317.7)    | NS              | -0.52                 | 0.602                          |
| Protein, g              | 57.8 ± 29.9<br>(55.2, 60.3)        | 59.5 ± 34.5<br>(56.6, 62.4)        | 57.1 ± 29.9<br>(54.6, 59.7)        | NS              | -0.44                 | 0.658                          |
| Fat, g                  | 25.2 ± 21.8<br>(23.3, 27.0)        | 24.6 ± 20.9<br>(22.8, 26.3)        | 24.5 ± 19.9<br>(22.8, 26.2)        | NS              | -0.64                 | 0.523                          |
| <b>Women</b>            |                                    |                                    |                                    |                 |                       |                                |
| <i>n</i>                | 727                                | 726                                | 732                                |                 |                       |                                |
| ALM, kg                 | 17.16 ± 4.06<br>(16.86, 17.45)     | 17.35 ± 4.18<br>(17.04, 17.65)     | 17.97 ± 4.33<br>(17.66, 18.28)     | A, B < C        | 3.50                  | < 0.001                        |
| ABM, kg                 | 0.93 ± 0.28<br>(0.91, 0.95)        | 0.94 ± 0.29<br>(0.92, 0.96)        | 0.97 ± 0.29<br>(0.95, 0.99)        | A < C           | 2.41                  | < 0.05                         |
| WBFM, kg <sup>†</sup>   | 15.26 ± 6.04<br>(14.82, 15.70)     | 17.37 ± 5.68<br>(16.96, 17.79)     | 18.53 ± 5.23<br>(18.15, 18.91)     | A < B < C       | 10.90                 | < 0.001                        |
| WBLM, kg                | 40.91 ± 8.06<br>(40.32, 41.50)     | 41.64 ± 8.28<br>(41.03, 42.24)     | 43.22 ± 8.57<br>(42.60, 43.84)     | A, B < C        | 5.18                  | < 0.001                        |
| %FM, % <sup>†</sup>     | 26.87 ± 8.56<br>(26.25, 27.49)     | 29.36 ± 7.95<br>(28.78, 29.94)     | 30.11 ± 7.19<br>(29.59, 30.63)     | A < B, C        | 7.14                  | < 0.001                        |
| SBP, mm Hg              | 128.5 ± 18.8<br>(127.1, 129.8)     | 131.5 ± 17.8<br>(130.2, 132.7)     | 133.6 ± 16.6<br>(132.4, 134.8)     | A < B, C        | 5.74                  | < 0.001                        |
| DBP, mm Hg              | 76.4 ± 10.2                        | 77.7 ± 9.6                         | 79.8 ± 9.6                         | A < B < C       | 6.48                  | < 0.001                        |

|                         |                                    |                                    |                                    |              |        |         |
|-------------------------|------------------------------------|------------------------------------|------------------------------------|--------------|--------|---------|
|                         | (75.7, 77.2)                       | (77.0, 78.4)                       | (79.1, 80.5)                       |              |        |         |
| TC, mg/dL <sup>†</sup>  | 183.6 ± 34.6<br>(181.1, 186.1)     | 189.5 ± 34.9<br>(186.9, 192.0)     | 200.9 ± 38.2<br>(198.2, 203.7)     | A < B < C    | 8.51   | < 0.001 |
| HDL, mg/dL <sup>†</sup> | 51.6 ± 11.9<br>(50.8, 52.5)        | 45.6 ± 9.7<br>(44.9, 46.3)         | 41.5 ± 9.2<br>(40.9, 42.2)         | A > B > C    | -18.16 | < 0.001 |
| AST, U/L <sup>†</sup>   | 23.9 ± 10.0<br>(23.2, 24.6)        | 23.2 ± 9.4<br>(22.6, 23.9)         | 25.1 ± 12.9<br>(24.2, 26.0)        | A > B, B < C | 0.95   | 0.345   |
| ALT, U/L <sup>†</sup>   | 18.9 ± 11.1<br>(18.1, 19.7)        | 19.9 ± 11.6<br>(19.0, 20.7)        | 23.4 ± 15.2<br>(22.3, 24.5)        | A < B < C    | 8.62   | < 0.001 |
| Crea, mg/dL             | 0.813 ± 0.206<br>(0.798, 0.828)    | 0.841 ± 0.255<br>(0.823, 0.860)    | 0.866 ± 0.225<br>(0.850, 0.883)    | A, B < C     | 4.98   | < 0.001 |
| TEI, kcal/d             | 1731.9 ± 649.7<br>(1684.5, 1779.2) | 1639.7 ± 655.6<br>(1645.9, 1741.5) | 1711.2 ± 698.3<br>(1660.5, 1761.8) | NS           | -0.95  | 0.343   |
| Cabo, g                 | 313.1 ± 120.9<br>(304.3, 321.9)    | 310.2 ± 115.3<br>(301.8, 318.6)    | 308.3 ± 110.8<br>(300.3, 316.4)    | NS           | -0.60  | 0.547   |
| Protein, g              | 58.5 ± 31.2<br>(56.2, 60.8)        | 55.2 ± 27.8<br>(53.2, 57.2)        | 56.5 ± 30.2<br>(54.3, 58.6)        | NS           | -1.23  | 0.218   |
| Fat, g                  | 25.3 ± 22.8<br>(23.6, 26.9)        | 23.5 ± 19.5<br>(22.1, 24.9)        | 24.7 ± 28.5<br>(22.7, 26.8)        | NS           | -1.48  | 0.139   |

Values are means ± SD (95% CI). <sup>†</sup>Mann-Whitney U test was applied to assess the difference between groups. <sup>‡</sup>Jonckheere-Terpstra test was used to assess the trend among three groups. SS = standardized statistic; ALM = Appendicular lean mass; ABM = Appendicular bone mass; WBFM = Whole body fat mass; WBLM = Whole body lean mass; %FM = percentage of fat mass; SBP = systolic blood pressure; DBP = diastolic blood pressure; TC = Total cholesterol; HDL = high density lipoprotein cholesterol; AST = Aspartate transaminase; ALT = alanine transaminase; Crea = Creatinine; TEI = Total energy intake; Carbo = Carbohydrate.

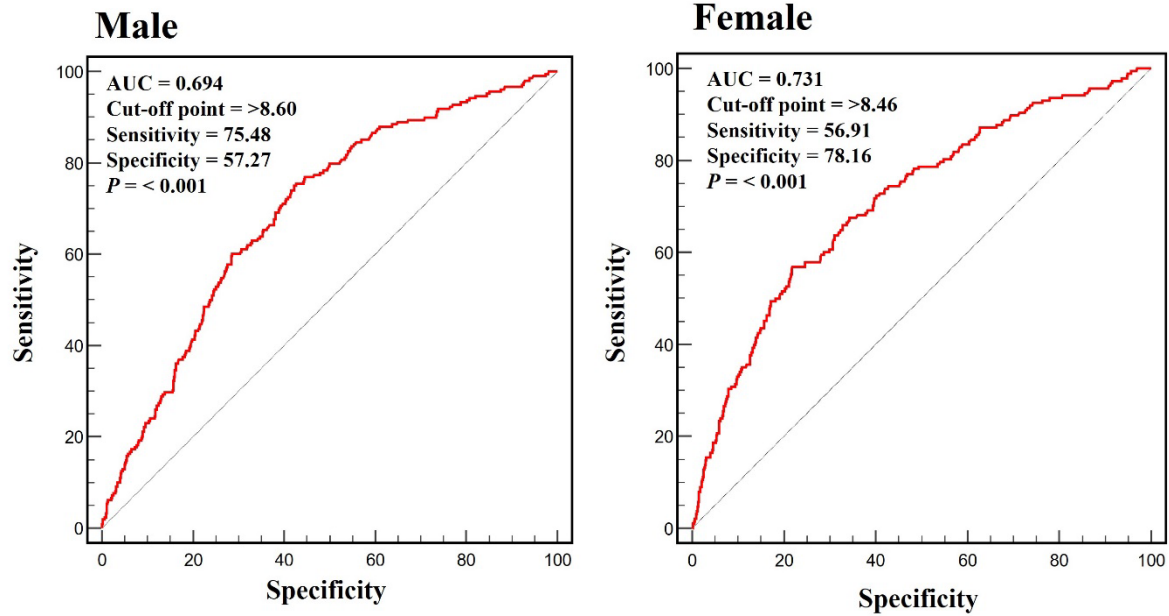

**Figure S1.** Sex-specific ROC curves pertaining to the TyG index for the Sarcopenic obesity group among the young reference group. Dotted blue line: reference; solid red line: AUC, indicative of the accuracy of the use of the TyG index for the identification of sarcopenic obesity; cut-off value: the value of the TyG index that predicts sarcopenic obesity; sensitivity: the probability of individuals who actually have sarcopenic obesity being identified as having sarcopenic obesity; specificity: the probability of individuals who do not have sarcopenic obesity being identified as not having sarcopenic obesity. Abbreviations: AUC, the area under the curve; ROC, receiver operating characteristic.
